# Supplementary material
Source: ML conference proceedings conference paper supplement (https://openaccess.thecvf.com/content/CVPR_2020/html/Ramos_Straight_to_the_CVPR_2020_paper.html)
Supplement: Supplementary file 2 [file Ramos_Straight_to_the_CVPR_2020_supplemental.zip]

Archive with 3 entries (3 files):
- 09054-supp/09054-supp.mp4
- 09054-supp/09054-supp.pdf
- 09054-supp/README
