# Supplementary material
Source: ML conference proceedings conference paper supplement (https://openaccess.thecvf.com/content/CVPR_2020/html/Ramos_Straight_to_the_CVPR_2020_paper.html)
Supplement: Supplementary file 2 [file Ramos_Straight_to_the_CVPR_2020_supplemental.zip › 09054-supp/README]

Video File: 09054-supp.mp4
Video codec: x264
Download link: https://www.videolan.org/developers/x264.html
